# Supplementary material for: Transcriptomic study of the mechanism of anoikis resistance in head and neck squamous carcinoma
Source: PeerJ journal article supplement (doi:10.7717/peerj.6978), 2019-05-23

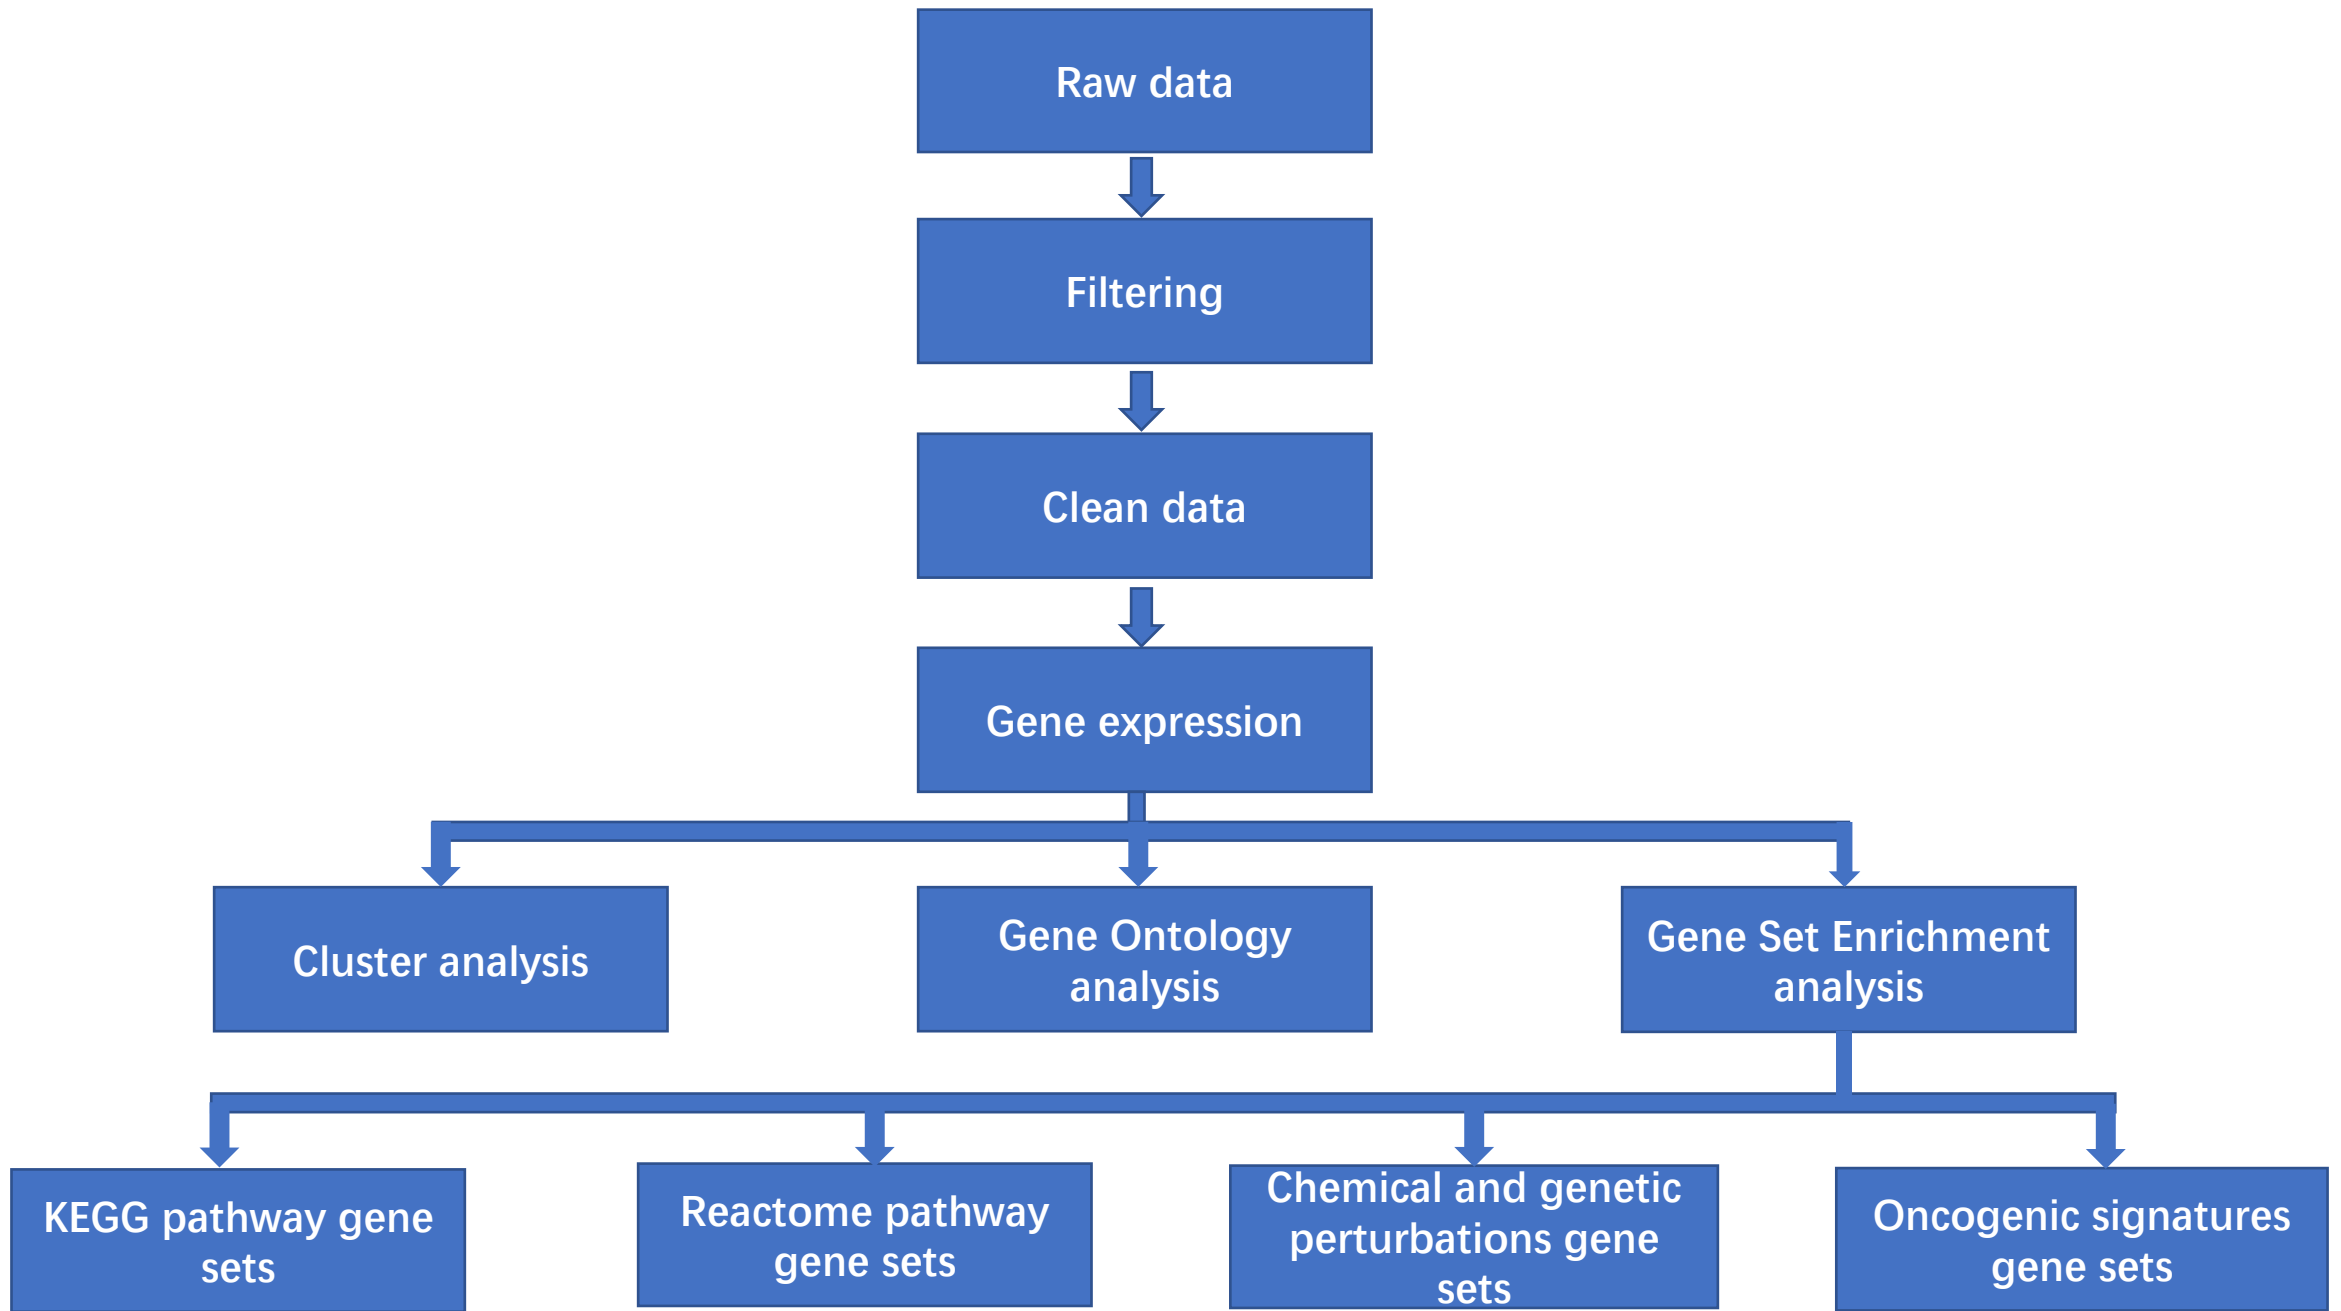

Supplement: Supplemental_Figure_S1.pdf [file Supplemental_Figure_S1.pdf]
